# Supplementary material
Source: PubMed Central journal article supplement (PMC6644293)
Supplement: ao6b00279_si_001.pdf [file ao6b00279_si_001.pdf]

## Supporting information

### Selective Bactericidal Activity of Divalent Metal Salts of Lauric Acid

Yoshiaki Yamamoto<sup>†</sup>, Toshiya Morikawa<sup>‡</sup>, Takahiro Kawai<sup>†</sup> and Yoshimune Nonomura<sup>†\*</sup>

**Table S1.** Bactericidal activities of the lauric acid and its divalent metal salts.

|             |                    | <i>S. aureus</i>      |     |     |      |
|-------------|--------------------|-----------------------|-----|-----|------|
|             |                    | 0 h                   | 1 h | 3 h | 24 h |
| Lauric acid | Average            | 5.1                   | 3.0 | <1  | <1   |
|             | Standard deviation | 0.4                   | 1.0 | 0.0 | 0.0  |
| Mg salt     | Average            | 5.4                   | 2.9 | 0.9 | <1   |
|             | Standard deviation | 0.2                   | 0.8 | 1.5 | 0.0  |
| Ca salt     | Average            | 5.5                   | 4.3 | 2.5 | <1   |
|             | Standard deviation | 0.3                   | 0.9 | 2.3 | 0.0  |
| Mn salt     | Average            | 5.6                   | <1  | <1  | <1   |
|             | Standard deviation | 0.0                   | 0.0 | 0.0 | 0.0  |
| Co salt     | Average            | 5.6                   | 2.4 | <1  | <1   |
|             | Standard deviation | 0.1                   | 0.5 | 0.0 | 0.0  |
| Ni salt     | Average            | 5.5                   | 2.2 | <1  | <1   |
|             | Standard deviation | 0.2                   | 0.2 | 0.0 | 0.0  |
| Cu salt     | Average            | 5.6                   | <1  | <1  | <1   |
|             | Standard deviation | 0.1                   | 0.0 | 0.0 | 0.0  |
| Zn salt     | Average            | 6.1                   | 5.7 | 5.6 | 4.9  |
|             | Standard deviation | 0.6                   | 0.1 | 0.1 | 0.2  |
|             |                    | <i>S. epidermidis</i> |     |     |      |
|             |                    | 0 h                   | 1 h | 3 h | 24 h |
| Lauric acid | Average            | 5.4                   | 5.3 | 5.3 | 4.8  |
|             | Standard deviation | 0.0                   | 0.0 | 0.0 | 0.0  |
| Mg salt     | Average            | 5.8                   | 5.8 | 5.8 | 4.1  |
|             | Standard deviation | 0.0                   | 0.0 | 0.1 | 0.1  |
| Ca salt     | Average            | 5.7                   | 5.4 | 5.4 | 5.1  |
|             | Standard deviation | 0.1                   | 0.1 | 0.1 | 0.3  |
| Mn salt     | Average            | 5.9                   | 5.9 | 5.3 | 5.4  |
|             | Standard deviation | 0.0                   | 0.1 | 0.5 | 0.3  |
| Co salt     | Average            | 5.8                   | 5.1 | 4.0 | <1   |
|             | Standard deviation | 0.0                   | 0.3 | 0.4 | 0.0  |
| Ni salt     | Average            | 5.8                   | 5.0 | 4.0 | <1   |
|             | Standard deviation | 0.0                   | 0.1 | 0.5 | 0.0  |
| Cu salt     | Average            | 5.9                   | <1  | <1  | <1   |
|             | Standard deviation | 0.0                   | 0.0 | 0.0 | 0.0  |
| Zn salt     | Average            | 5.9                   | 5.8 | 5.8 | 5.5  |
|             | Standard deviation | 0.0                   | 0.1 | 0.0 | 0.1  |
|             |                    | <i>P. acnes</i>       |     |     |      |
|             |                    | 0 h                   | 1 h | 3 h | 24 h |
| Lauric acid | Average            | 5.5                   | 5.6 | 1.8 | <1   |
|             | Standard deviation | 0.2                   | 0.6 | 1.6 | 0.0  |
| Mg salt     | Average            | 5.6                   | 5.5 | 5.1 | <1   |
|             | Standard deviation | 0.1                   | 0.0 | 0.2 | 0.0  |
| Ca salt     | Average            | 5.5                   | 5.2 | 4.6 | 0.8  |
|             | Standard deviation | 0.1                   | 0.2 | 0.5 | 1.4  |
| Mn salt     | Average            | 5.8                   | 4.5 | <1  | <1   |
|             | Standard deviation | 0.1                   | 0.0 | 0.0 | 0.0  |
| Co salt     | Average            | 5.8                   | 3.7 | <1  | <1   |
|             | Standard deviation | 0.1                   | 0.0 | 0.0 | 0.0  |
| Ni salt     | Average            | 5.7                   | 4.2 | <1  | <1   |
|             | Standard deviation | 0.1                   | 0.1 | 0.0 | 0.0  |
| Cu salt     | Average            | 5.9                   | 5.3 | <1  | <1   |
|             | Standard deviation | 0.1                   | 0.2 | 0.0 | 0.0  |
| Zn salt     | Average            | 5.9                   | 5.8 | 5.5 | 3.1  |
|             | Standard deviation | 0.0                   | 0.1 | 0.0 | 0.1  |

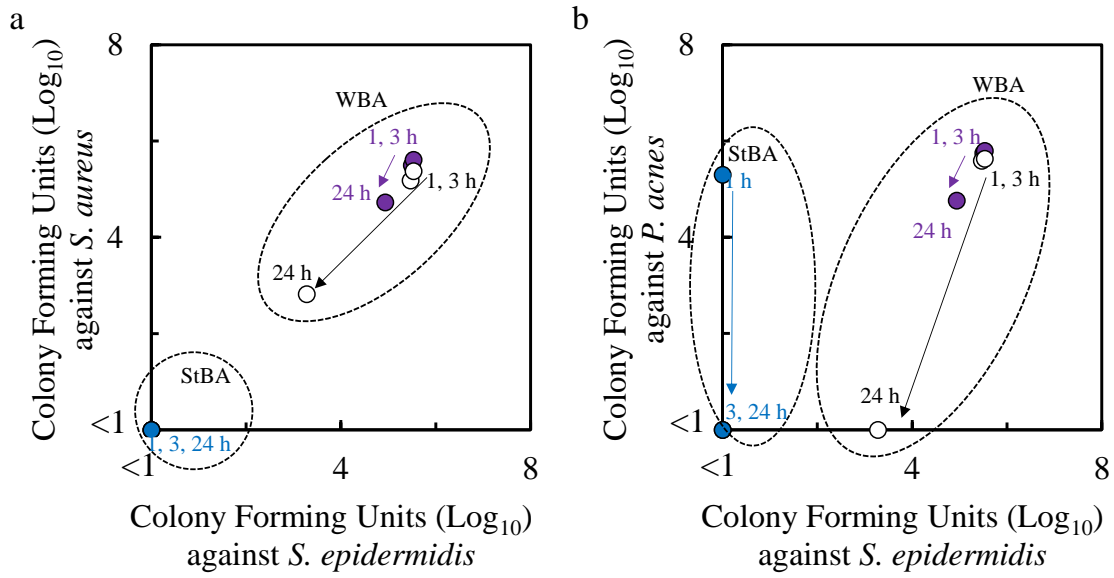

**Figure S1.** Bactericidal activities of metallic chlorides. Temporal changes of CFU for *S. aureus* and *S. epidermidis* (a) and *P. acnes* and *S. epidermidis* (b). Purple circle:  $\text{CoCl}_2$ ; blue circle:  $\text{CuCl}_2$ ; white circle:  $\text{ZnCl}_2$ .

**Table S2.** Bactericidal activities of the metallic chlorides.

|         |                    | <i>S. aureus</i>      |     |     |      |
|---------|--------------------|-----------------------|-----|-----|------|
|         |                    | 0 h                   | 1 h | 3 h | 24 h |
| Co salt | Average            | 5.7                   | 5.6 | 5.5 | 4.7  |
|         | Standard deviation | 0.0                   | 0.1 | 0.1 | 0.3  |
| Ni salt | Average            | 5.7                   | 5.5 | 5.4 | 4.2  |
|         | Standard deviation | 0.1                   | 0.1 | 0.1 | 0.3  |
| Cu salt | Average            | 5.7                   | <1  | <1  | <1   |
|         | Standard deviation | 0.1                   | 0.0 | 0.0 | 0.0  |
| Zn salt | Average            | 5.6                   | 5.4 | 5.2 | 2.8  |
|         | Standard deviation | 0.1                   | 0.1 | 0.0 | 0.6  |
|         |                    | <i>S. epidermidis</i> |     |     |      |
|         |                    | 0 h                   | 1 h | 3 h | 24 h |
| Co salt | Average            | 5.5                   | 5.5 | 5.5 | 4.9  |
|         | Standard deviation | 0.0                   | 0.1 | 0.0 | 0.1  |
| Ni salt | Average            | 5.5                   | 5.3 | 5.2 | 4.2  |
|         | Standard deviation | 0.0                   | 0.0 | 0.0 | 0.2  |
| Cu salt | Average            | 5.5                   | <1  | <1  | <1   |
|         | Standard deviation | 0.0                   | 0.0 | 0.0 | 0.0  |
| Zn salt | Average            | 5.5                   | 5.5 | 5.5 | 3.3  |
|         | Standard deviation | 0.0                   | 0.1 | 0.0 | 0.2  |
|         |                    | <i>P. acnes</i>       |     |     |      |
|         |                    | 0 h                   | 1 h | 3 h | 24 h |
| Co salt | Average            | 5.9                   | 5.8 | 5.7 | 4.8  |
|         | Standard deviation | 0.1                   | 0.1 | 0.1 | 0.2  |
| Ni salt | Average            | 5.9                   | 5.8 | 5.7 | 3.8  |
|         | Standard deviation | 0.0                   | 0.0 | 0.1 | 0.2  |
| Cu salt | Average            | 5.7                   | 5.3 | <1  | <1   |
|         | Standard deviation | 0.0                   | 0.1 | 0.0 | 0.0  |
| Zn salt | Average            | 5.7                   | 5.6 | 5.6 | <1   |
|         | Standard deviation | 0.0                   | 0.0 | 0.1 | 0.0  |

**Table S3.** The surface tension of the solubility of metal salts of lauric acid in 2wt% aqueous ethanol at 25°C and 50% humidity. The metal salt concentration was 0.1 g L<sup>-1</sup>.

|                                      | Mg salt  | Ca salt  | Mn salt  | Co salt  | Ni salt  | Cu salt  | Zn salt  | Water    |
|--------------------------------------|----------|----------|----------|----------|----------|----------|----------|----------|
| Surface tension / mN m <sup>-1</sup> | 70.8±2.0 | 71.2±1.3 | 72.7±1.4 | 70.6±1.2 | 71.7±1.2 | 71.4±1.8 | 72.1±1.7 | 71.7±3.2 |
